# Supplementary figures and images for: Tumor-induced MDSC act via remote control to inhibit L-selectin-dependent adaptive immunity in lymph nodes
Source: eLife journal article supplement (doi:10.7554/elife.17375), 2016-12-08

Figure 1—Figure Supplement 1

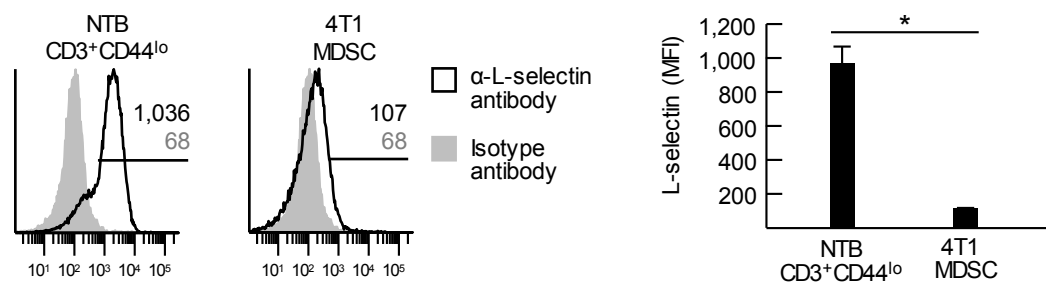

Supplement: supp [file elife-17375-supp-v1.zip]

Figure 1—Figure Supplement 2

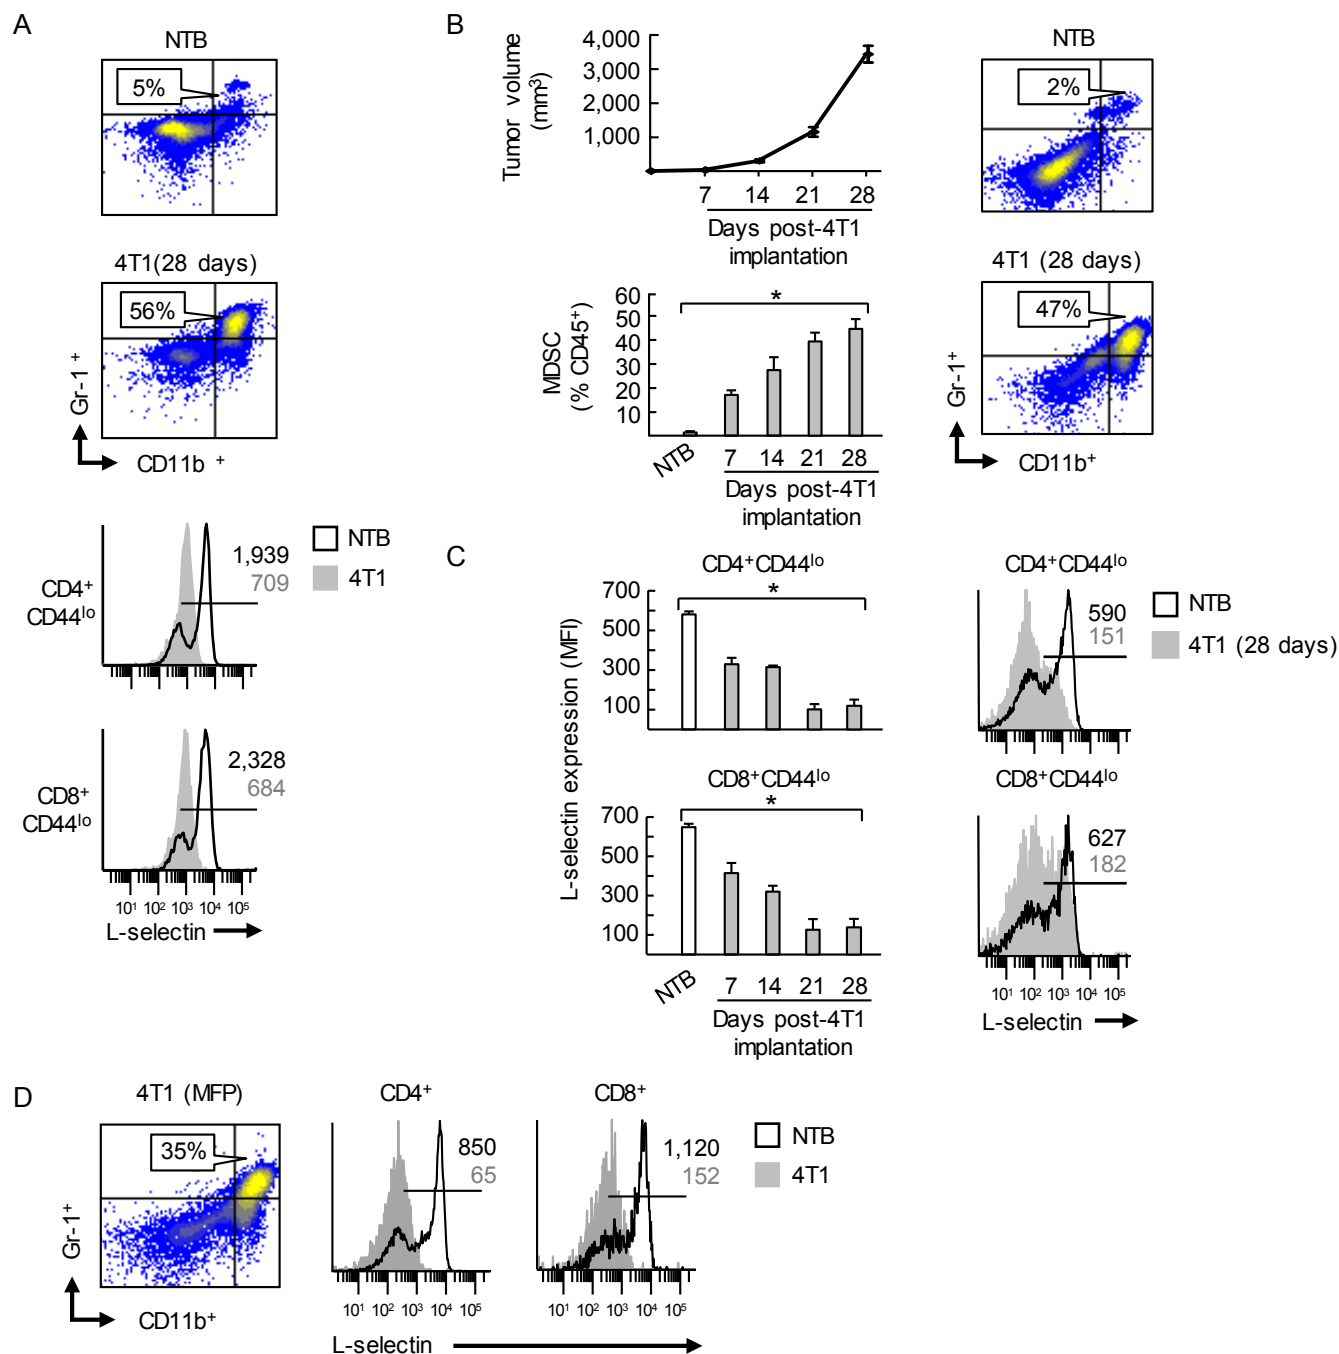

Supplement: supp [file elife-17375-supp-v1.zip]

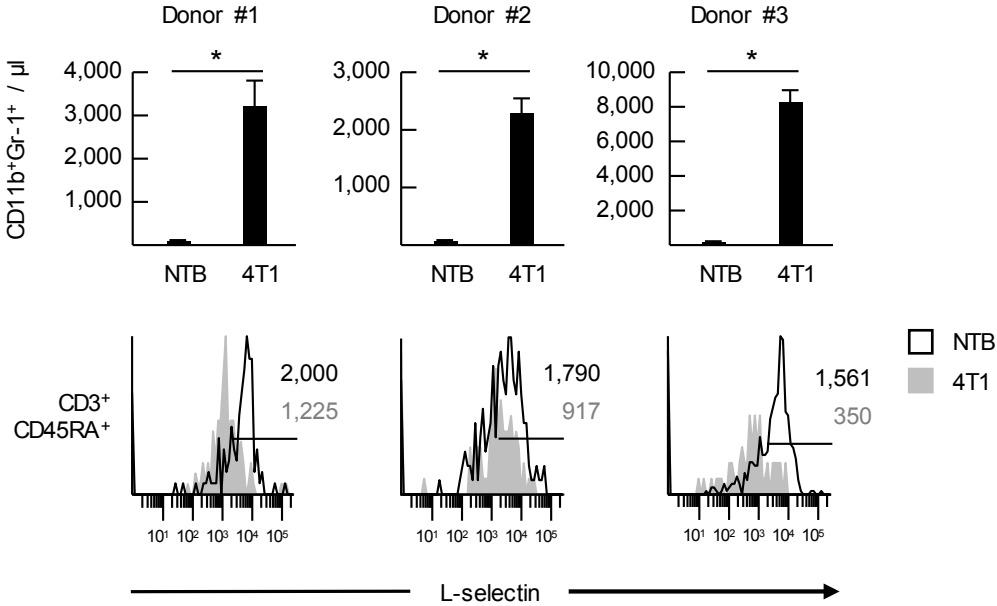

Supplement: supp [file elife-17375-supp-v1.zip]

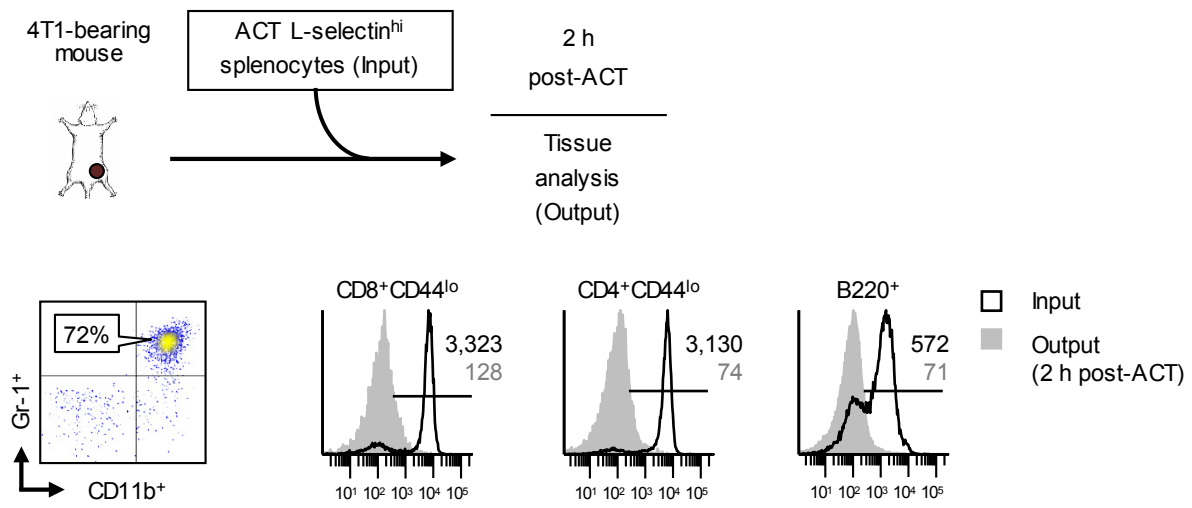

Supplement: supp [file elife-17375-supp-v1.zip]

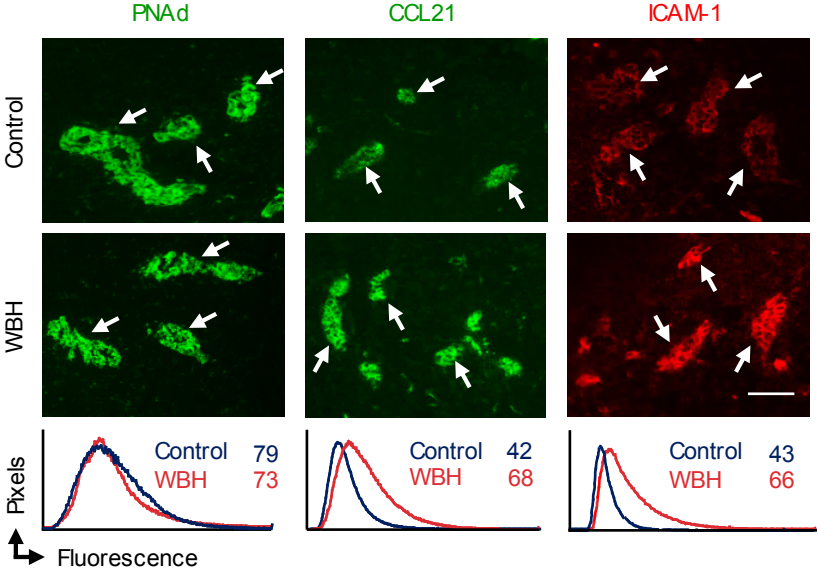

Supplement: supp [file elife-17375-supp-v1.zip]

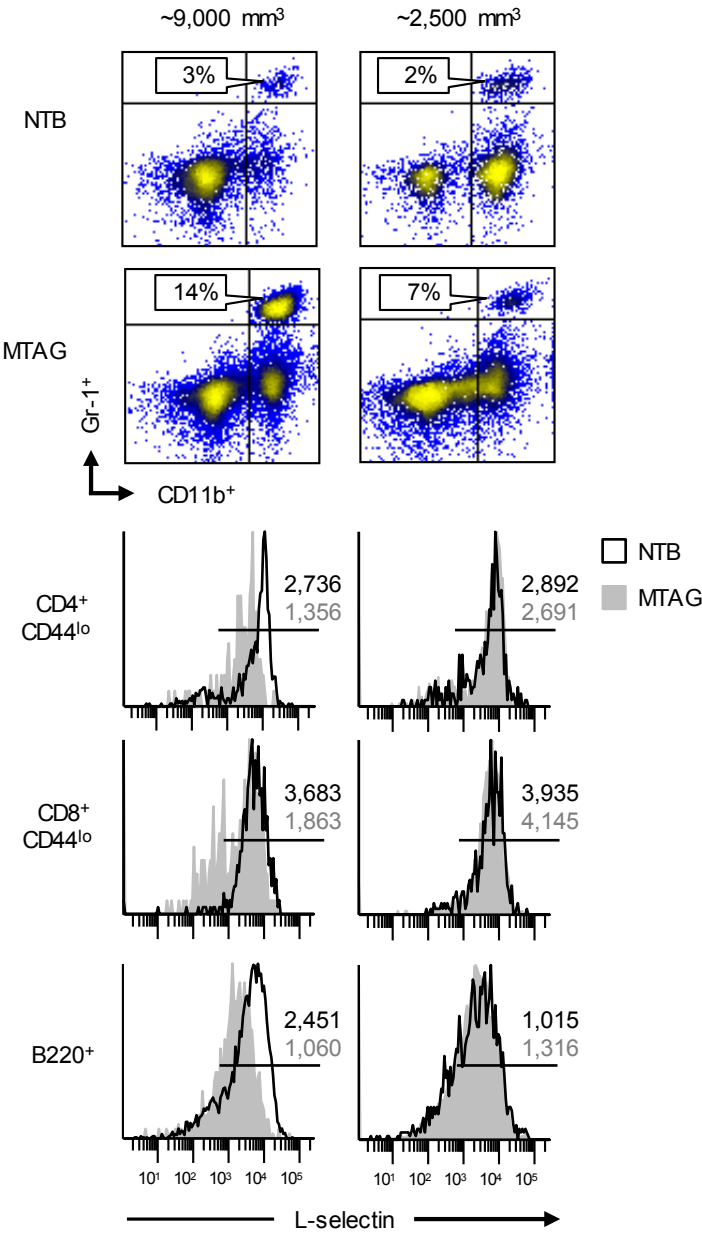

Supplement: supp [file elife-17375-supp-v1.zip]

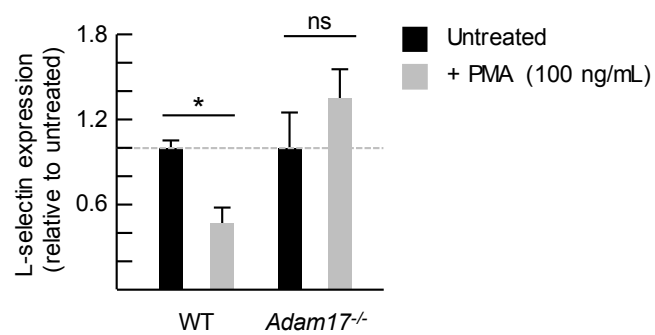

Supplement: supp [file elife-17375-supp-v1.zip]

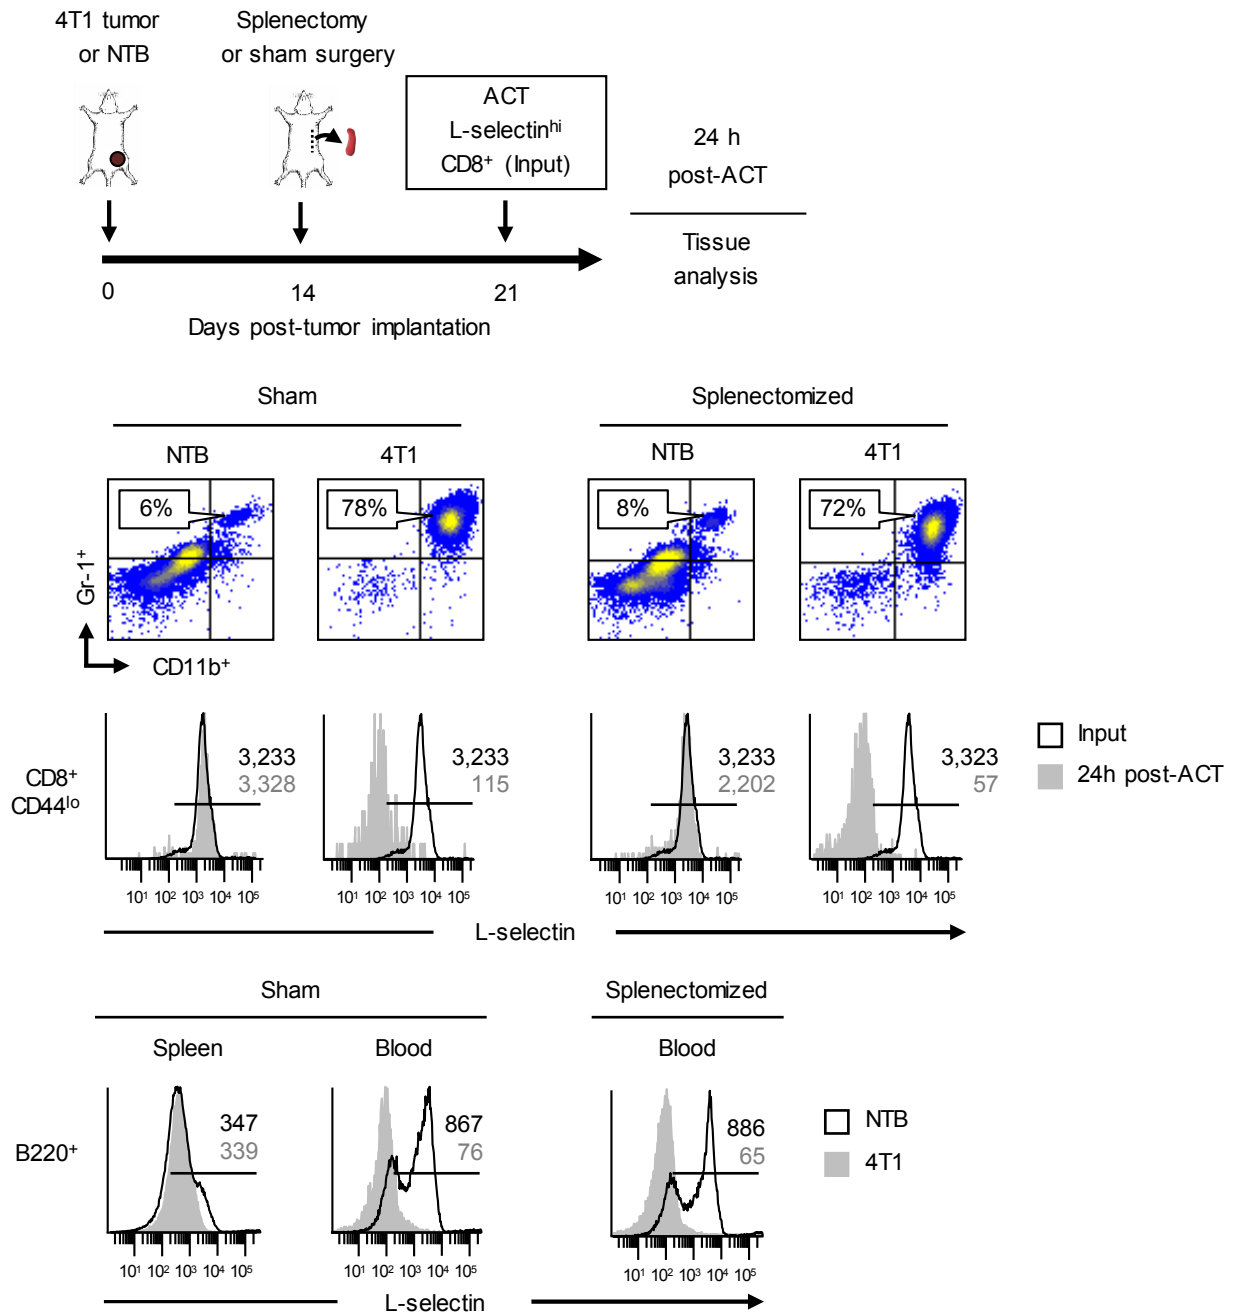

Supplement: supp [file elife-17375-supp-v1.zip]

A

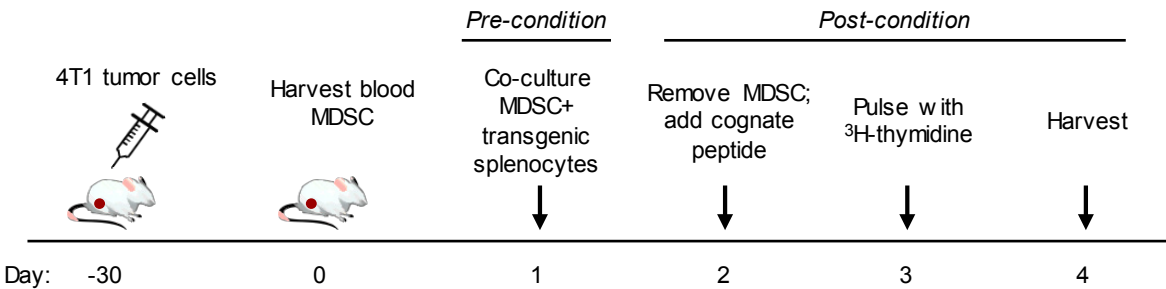

B

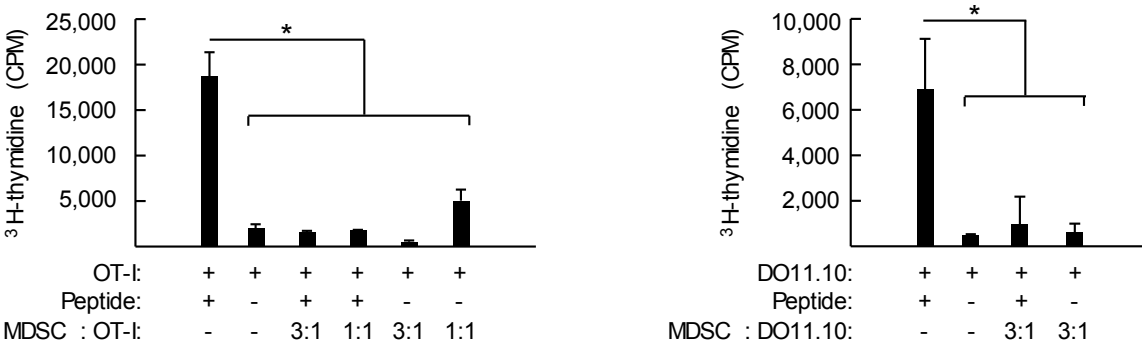

Supplement: supp [file elife-17375-supp-v1.zip]

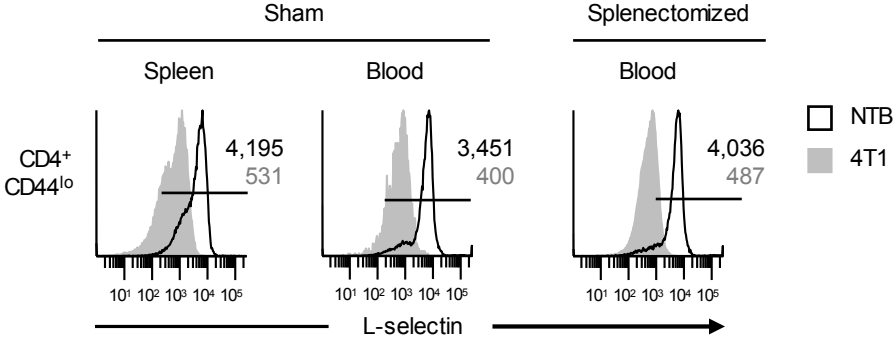

Supplement: supp [file elife-17375-supp-v1.zip]

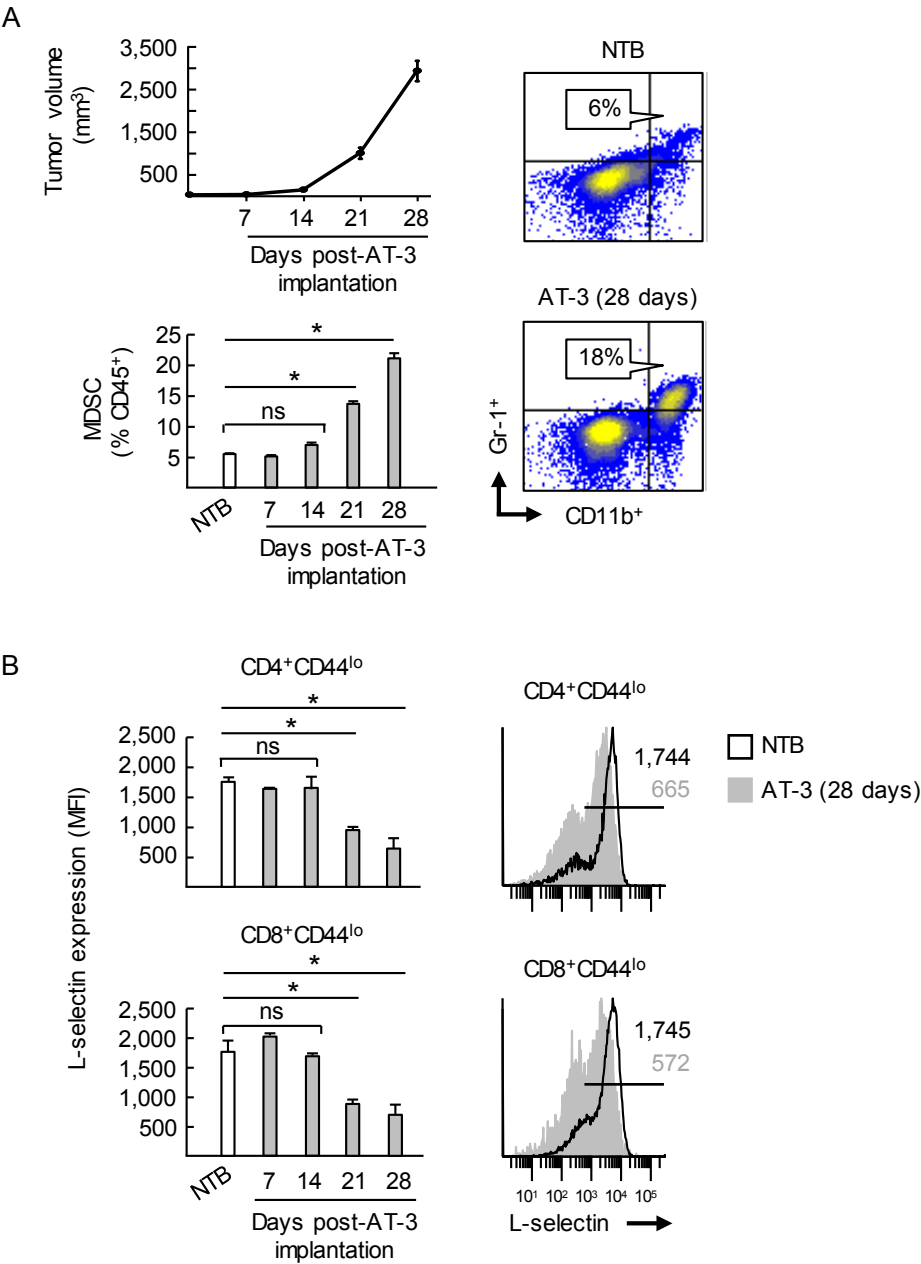

Supplement: supp [file elife-17375-supp-v1.zip]

Figure 6—Figure Supplement 1

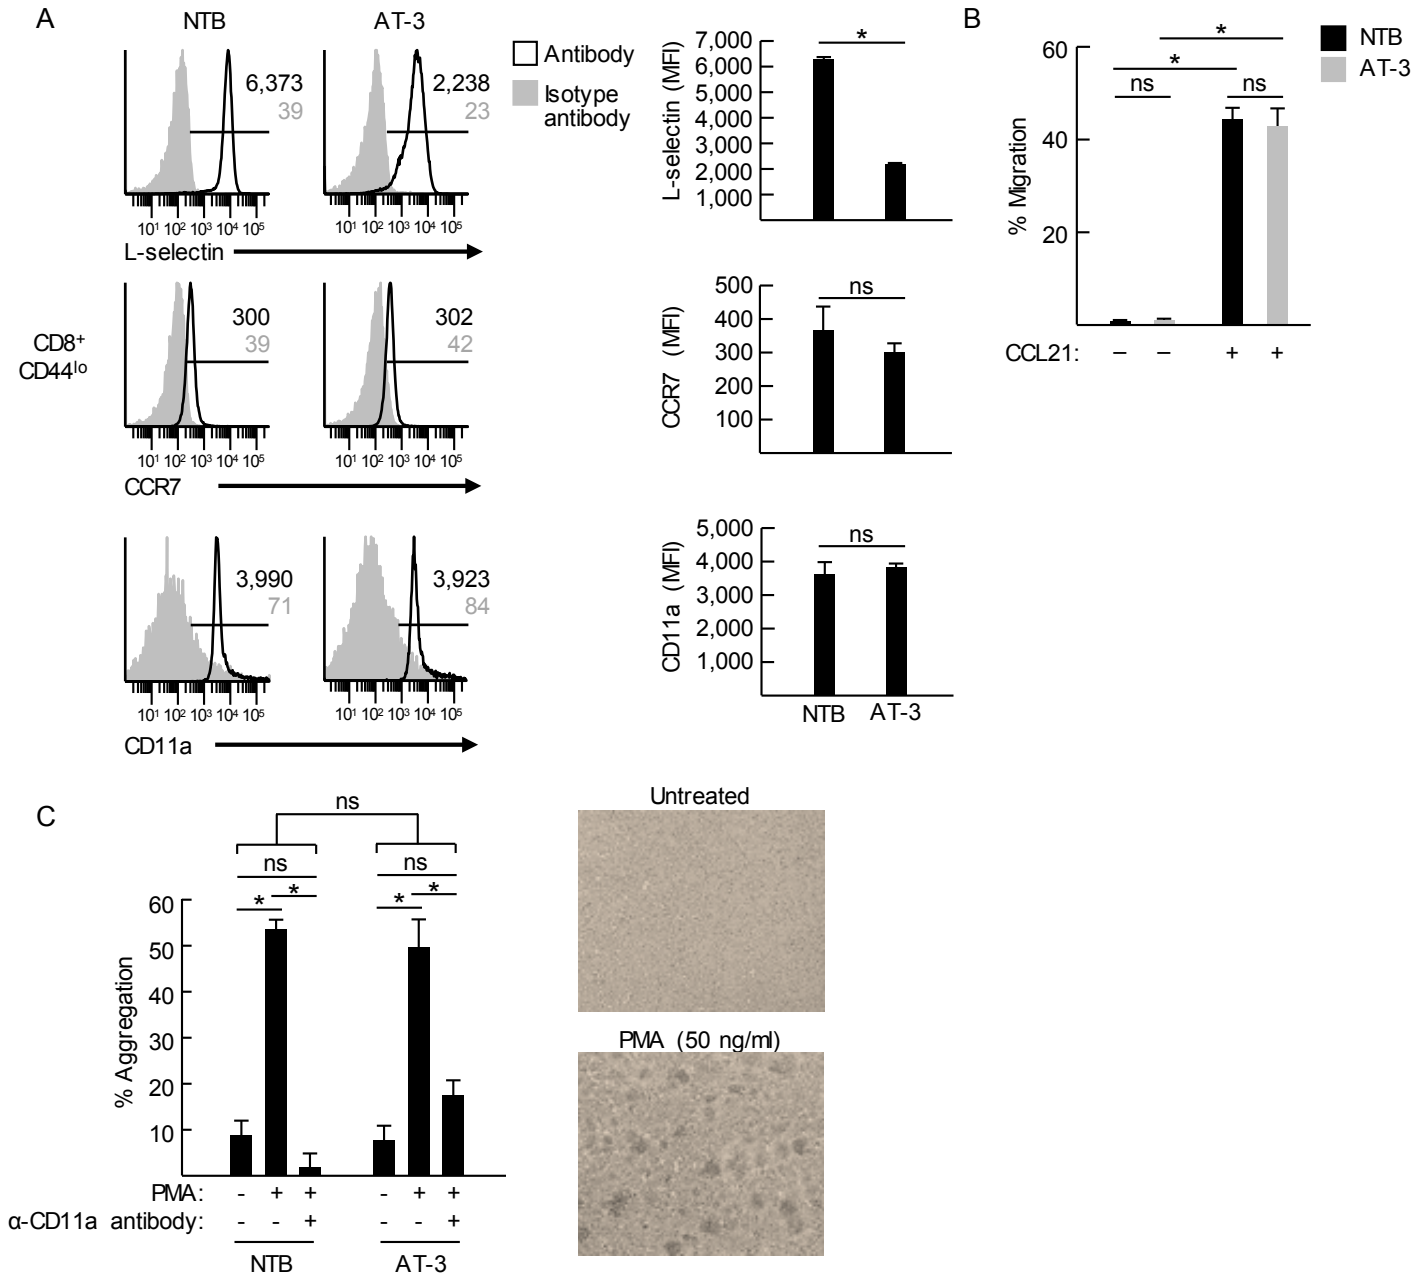

Supplement: supp [file elife-17375-supp-v1.zip]
